# Supplementary material for: Targeted Sterically Stabilized Phospholipid siRNA Nanomedicine for Hepatic and Renal Fibrosis
Source: Nanomaterials (Basel). 2016 Jan 5;6(1):8. doi: 10.3390/nano6010008 (PMC5302539; doi:10.3390/nano6010008)

## Supplementary Material

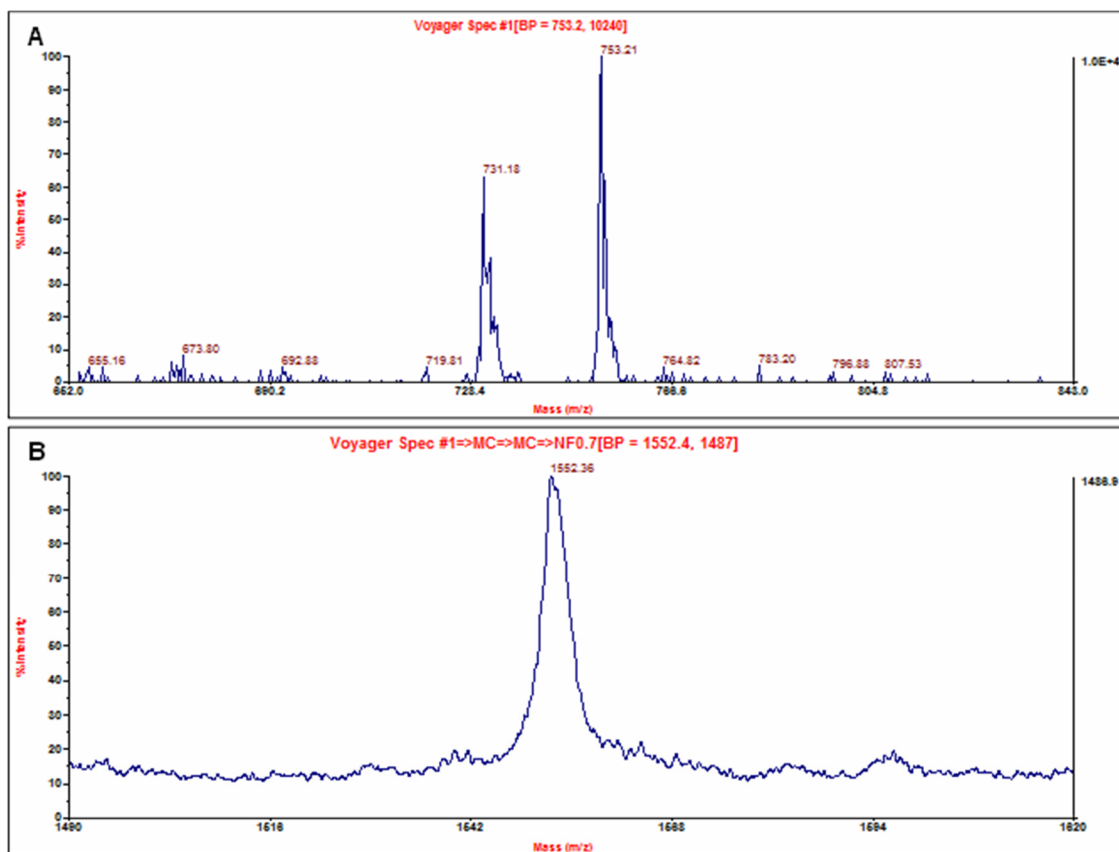

**Figure S1.** Accumulated mass spectrum (100 shots/ spectra) of **(A)** Ptdthioethanol lipid; and **(B)** cationic lipid-Z, with shift in molecular weight confirming 4R peptide conjugation.

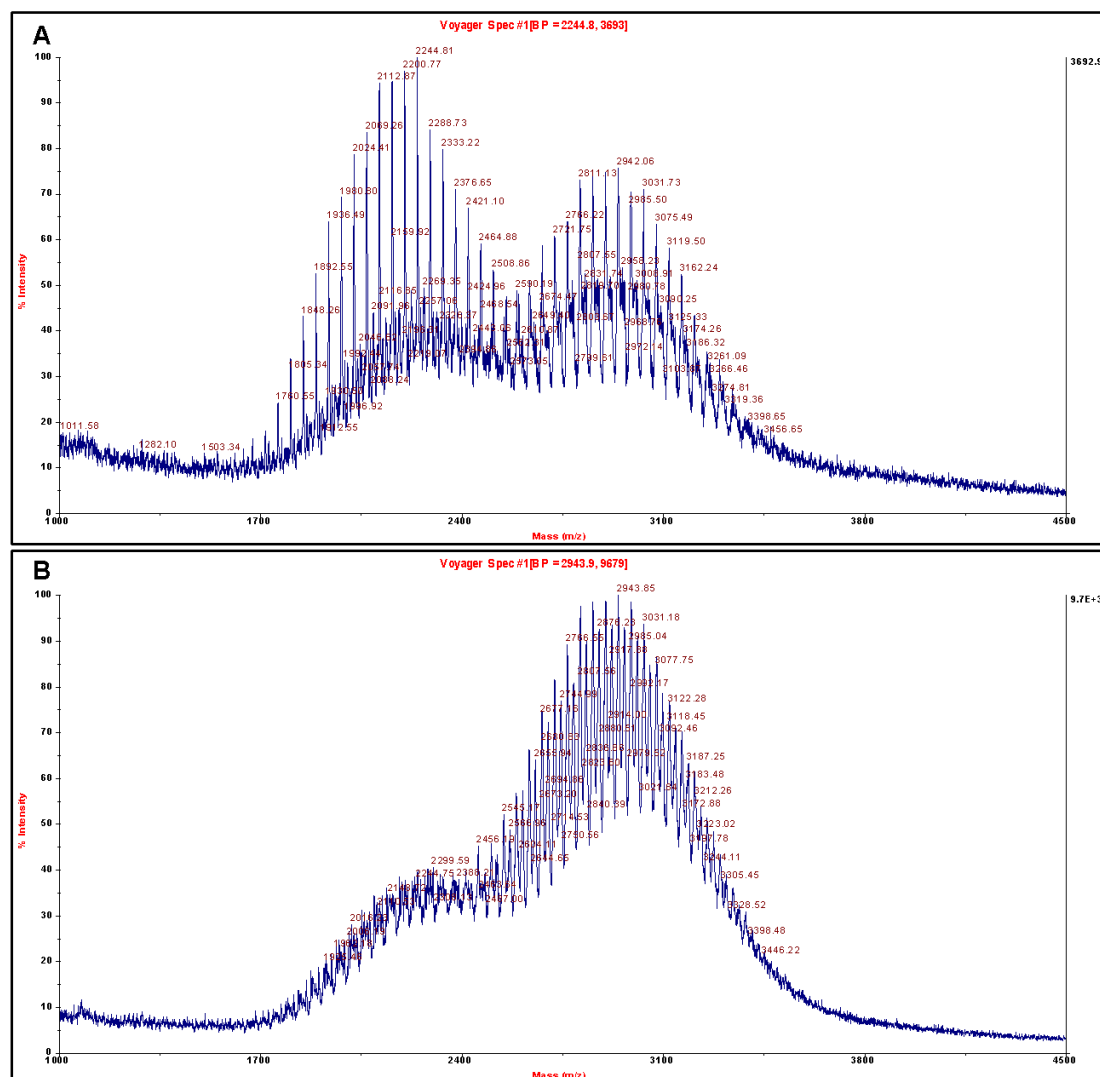

**Figure S2.** Mass spectrum of (A) free DSPE-PEG2000-COOH; and (B) conjugated DSPE-PEG2000-Galactosamine showing a shift in molecular weight confirming conjugation.

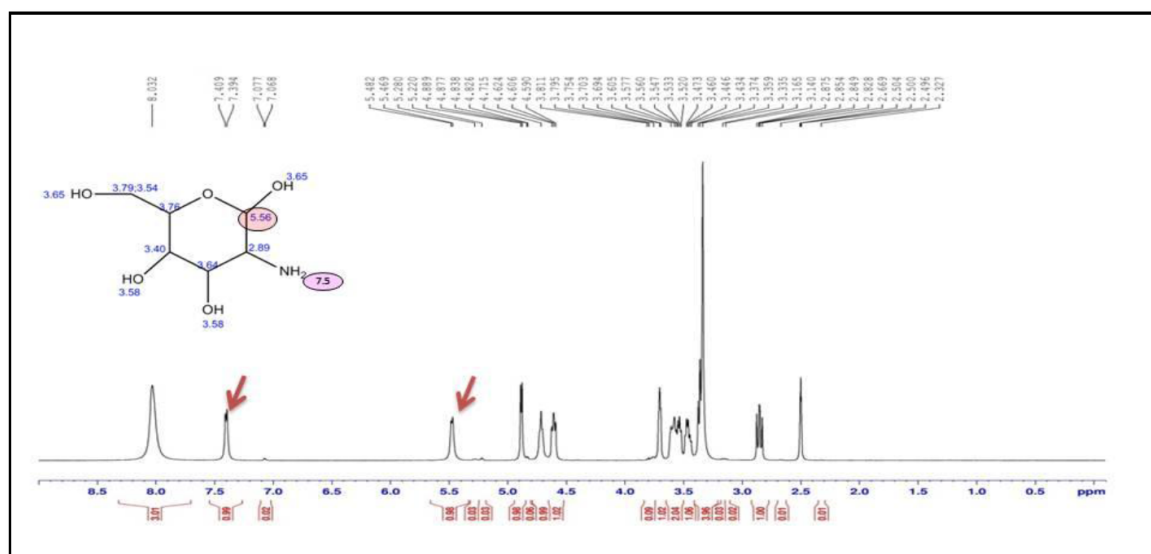

**Figure S3.** Cont.

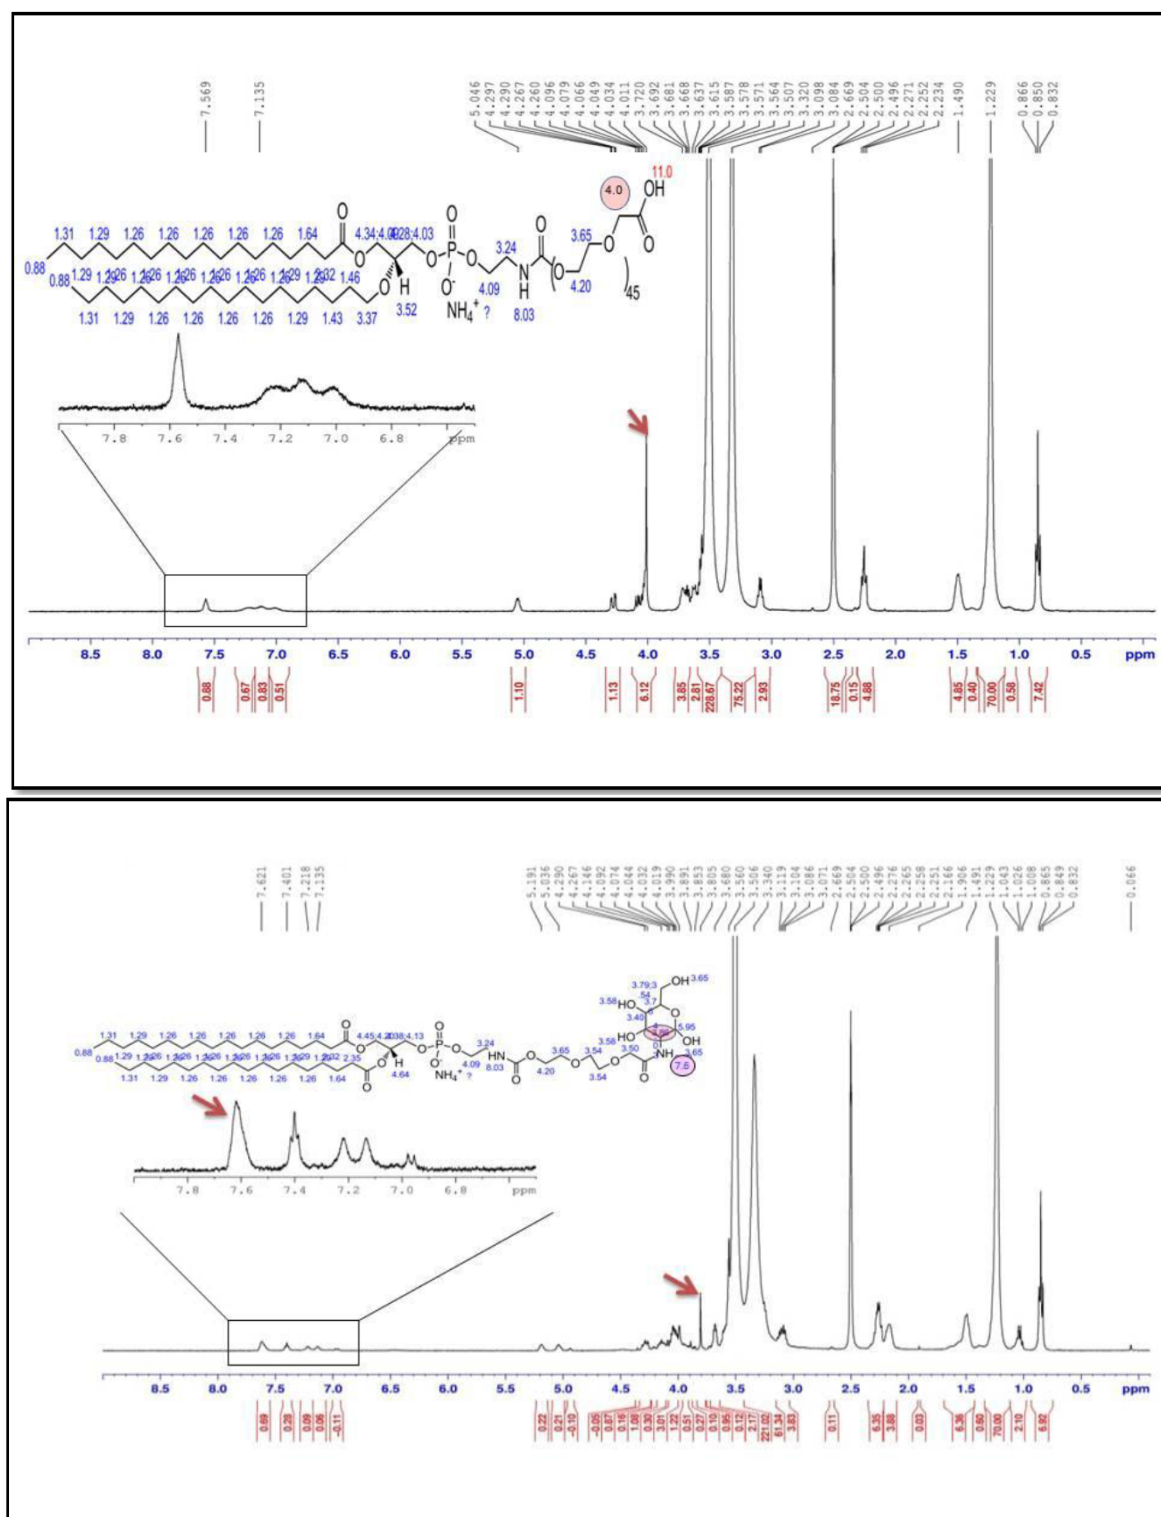

**Figure S3.** NMR spectrum of D-galactosamine (upper spectrum), DSPE-PEG2000-COOH (middle spectrum) and DSPE-PEG2000-Galactosamine (lower spectrum) with peak shifts indicating successful conjugation. Percent conjugation was calculated from spectra to be ~30%.

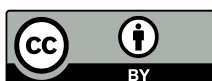

Supplement: Supplementary file 1 [file nanomaterials-06-00008-s001.pdf]
